# Supplementary material for: Chlorine-based DUWL disinfectant leads to a different microbial composition of water derived biofilms compared to H2O2-based chemical disinfectants in vitro
Source: PeerJ. 2020 Jul 15;8:e9503. doi: 10.7717/peerj.9503 (PMC7368430; doi:10.7717/peerj.9503)
Supplement: File S1 — The total OTUs of each biofilm sample and the genus names determined in column CL. [file peerj-08-9503-s001.xlsx]

## Sheet: Sheet1
#OTU ID	Taxonomy	D1	D2	D3	D4	D5	ANX.w1.1	ANX.w1.2	ANX.w1.3	ANX.w2.1	ANX.w2.2	ANX.w2.3	ANX.w3.1	ANX.w3.2	ANX.w3.3	ANX.w4.1	ANX.w4.2	ANX.w4.3	CIT.w1.1	CIT.w1.2	CIT.w1.3	CIT.w2.1	CIT.w2.2	CIT.w2.3	CIT.w3.1	CIT.w3.2	CIT.w3.3	CIT.w4.1	CIT.w4.2	CIT.w4.3	DTS.w1.1	DTS.w1.2	DTS.w1.3	DTS.w2.1	DTS.w2.2	DTS.w2.3	DTS.w3.1	DTS.w3.2	DTS.w3.3	DTS.w4.2	DTS.w4.3	GAC.w1.1	GAC.w1.2	GAC.w1.3	GAC.w2.1	GAC.w2.2	GAC.w2.3	GAC.w3.1	GAC.w3.2
OTU_92	Bacteria	Actinobacteria	Actinobacteria	Actinomycetales	Actinomycetaceae	Actinomyces	0	0	0	0	0	0	0	0	0	0	0	0	0	0	0	0	0	0	0	0	0	0	0	0	0	0	0	0	0	0	0	0	0	0	0	0	0	0	0	6.5716e-05	0	0	0
OTU_1	Bacteria	Actinobacteria	Actinobacteria	Corynebacteriales	Mycobacteriaceae	Mycobacterium	0.000261575	0	0.000154385	0.000227726	0.000272524	0.000314185	0.000375536	0.000157224	9.72242e-05	0.027027	0.00011029	4.48732e-05	0.00679848	0.00107258	0.000660814	0.000211846	0.00376206	0.0100148	0.0201437	0.0471492	0.152656	0.205294	0.131726	0.242732	0.000622717	0.00734187	0.0122941	0.0158144	0.00656814	0.0838838	0.289906	0.110975	0.0403684	0.241577	0.473614	0.0164578	0.0155367	0.00915486	0.0022237	0.0851022	0.233225	0.114049	0.0559941
OTU_59	Bacteria	Actinobacteria	Actinobacteria	Micrococcales	Microbacteriaceae		0	0	0	0	0	0	0	0	0	0	0	0	0	0	0	0	0	0	0	0	0	0	0	0	0	0	0	0	0	0	0	0	0	0	0	0	0	0	0	0	0	0	0
OTU_77	Bacteria	Bacteroidetes	Bacteroidia	Bacteroidales	Porphyromonadaceae	Porphyromonas	0	0	0	0	0	0	0	0	0	0	0	0	5.6654e-05	0	0	0	0	0	0	0	0	0	0	0	0	0	0	0	0	0	0	0	0	0	0	0	0	0	0	0	0	0	0
OTU_119	Bacteria	Bacteroidetes	Bacteroidia	Bacteroidales	Porphyromonadaceae	Tannerella	0	0	0	0	0	0	0	0	0	0	0	0	0	0	0	0	0	0	0	0	0	0	0	0	0	0	0	0	0	0	0	0	0	0	0	0	0	0	0	0	0	0	0
OTU_81	Bacteria	Bacteroidetes	Bacteroidia	Bacteroidales	Prevotellaceae	Prevotella	0	0	0	0	0	0	0	0	0	0	0	0	0	0	0	0	0	0	0	5.90842e-05	0	0	0	0	0	0	0	0	0	0	0	0	0	0	0	0	0	0	5.55926e-05	0	0	7.6646e-05	0
OTU_94	Bacteria	Bacteroidetes	Bacteroidia	Bacteroidales	Prevotellaceae	Prevotella	0	0	0	0	0	0	0	0	0	0	0	0	0	0	0	0	0	0	0	0	0	0	0	0	0	0	0	0	0	0	0	0	0	0	0	0	0	0	0	0	0	0	0
OTU_112	Bacteria	Bacteroidetes	Flavobacteriia	Flavobacteriales	Flavobacteriaceae	Capnocytophaga	0	0	0	0	0	0	0	0	0	0	0	0	0	0	0	0	0	0	0	0	0	0	0	0	0	0	0	0	0	0	0	0	0	0	0	0	0	0	0	0	0	0	0
OTU_2	Bacteria	Bacteroidetes	Flavobacteriia	Flavobacteriales	Flavobacteriaceae	Chryseobacterium	8.71916e-05	0.000115893	0.000102923	0.000341588	0.00010901	5.23642e-05	0.000160944	0.000157224	0.000194448	0.108108	0.00011029	4.48732e-05	0	4.46907e-05	0	0	0	0	0	0	0	0	0	0	0.000166058	0.000188253	4.97735e-05	0.000270331	0.000226488	0.000214811	0.000245008	0.000158309	0.000146972	0.000131268	0.000303988	0.000301978	0.000149751	0	0	0	0	0	0
OTU_105	Bacteria	Bacteroidetes	Sphingobacteriia	Sphingobacteriales	Chitinophagaceae	Hydrotalea	0	0	0	0	0	0	0	0	0	0	0	0	0	0	0	0	0	0	0	0	0	0	0	0	0	0	0	0	0	0	0	0	0	0	0	0.000150989	0	0	0	0	0	0	0
OTU_76	Bacteria	Bacteroidetes	Sphingobacteriia	Sphingobacteriales	Chitinophagaceae	Lacibacter	0	0	0	0	0	0	0	0	0	0	0	0	0	0	0	0	0	0	0	0	0	0	0	0	0	0	0	0	0	0	0	0	0	0	0	0	0	0	0	0	0	0	0
OTU_54	Bacteria	Bacteroidetes	Sphingobacteriia	Sphingobacteriales	Chitinophagaceae	Sediminibacterium	0	0	0	0	0	0	0	0	0	0	0	0	0	0	0	0	0	0	0	0	0	0	0	0	0	0	0	0	0	0	0	0	0	0	0	0	0	0	0	0	0	0	0
OTU_100	Bacteria	Bacteroidetes	Sphingobacteriia	Sphingobacteriales	Chitinophagaceae	Sediminibacterium	0	0	0	0	0	0	0	0	0	0	0	0	0	0	0	0	0	0	0	0	0	0	0	0	0	0	0	0	0	0	0	0	0	0	0	0	0	0	0	0	0	0	0
OTU_103	Bacteria	Bacteroidetes	Sphingobacteriia	Sphingobacteriales	env.OPS 17		0	0	0	0	0	0	0	0	0	0	0	0	0	0	0	0	0	0	0	0	0	0	0	0	0	0	0	0	0	0	0	0	0	0	0	0	0	0	0	0	7.19166e-05	0	0
OTU_39	Bacteria	Firmicutes	Bacilli	Bacillales	Bacillaceae		0	0	0	0	0	0	0	0	0	0	0	0.000179493	0	8.93815e-05	0	0.00059317	0.0100867	0	0.000679546	0	0	0	0	0	0	0	0	0	0	0	0	0	0	0	0	0	0	0	0	0	0	0	0
OTU_17	Bacteria	Firmicutes	Bacilli	Bacillales	Bacillaceae	Bacillus	0	0	0	0	0	0	0	0	0	0	0	0	0	0	0	0	0	0	4.8539e-05	0	0	0	0	0	0	0	0	0	0	0	0	0	0	0	0.000607977	0	0	0	0	0	0	0	0
OTU_37	Bacteria	Firmicutes	Bacilli	Bacillales	Bacillaceae	Fictibacillus	0.00030517	0	0	0	0	0	0	0	0	0	0	0	0	0.000759743	0	0	0.000218091	0	0	0	0	0	0	0	0	0	0	0	0	0	0	0	4.89908e-05	0	0	0	7.48755e-05	0	0	0	0	0	0
OTU_84	Bacteria	Firmicutes	Bacilli	Bacillales	Family XI	Gemella	0	0	0	0	0	0	0	0	0	0	0	0	0	0	0	0	0	0	0	0	0	0	0	0	0	0	0	0	0	0	0	0	0	0	0	0	0	0	0	0	0	0	6.16675e-05
OTU_45	Bacteria	Firmicutes	Bacilli	Bacillales	Paenibacillaceae	Brevibacillus	0	0	0	5.69314e-05	0	0	0	0	0	0	0.00011029	0.0149428	0	0	0	0	0	0	0	0	0	0	0	0	0	0	0	0	0	0	0	0	0	0	0	0	0	0	0	0	0	0	0
OTU_49	Bacteria	Firmicutes	Bacilli	Bacillales	Paenibacillaceae	Brevibacillus	0	0	0	0	0	0	0	0	0	0	0	0	0	0	0	0	0	0	0	0	0	0	0	0	0	0	0	0	0	0	0	0	0	0	0	0	0	0	0	0	0	0	0
OTU_20	Bacteria	Firmicutes	Bacilli	Bacillales	Paenibacillaceae	Paenibacillus	0	0	0	0	0	0	5.36481e-05	0	0	0	0	0	0	0	0.017842	4.23693e-05	0.000109045	5.92593e-05	0	0	0	0.000243962	6.96961e-05	0.070563	0	0	0	0	0.0706642	0	0.000122504	0	0	0	0	0	0	5.17224e-05	0	0	0	0	0.0380488
OTU_63	Bacteria	Firmicutes	Bacilli	Bacillales	Paenibacillaceae	Paenibacillus	0	0	0	0	0	0	0	0	0	0	0	0	0	0	0	0	0	0	0	0	0	0	0	0	0	0	0	0	0	0	0	0	0	0	0	0	0	0	0	0	0	0	0
OTU_64	Bacteria	Firmicutes	Bacilli	Bacillales	Paenibacillaceae	Paenibacillus	0	0	0	0	0	0	0	0	0	0	0	0	0	0	0	0	0	0	0	0	0	0	0	0	0	0	0	0	0	0	0	0	0	0	0	0	0	0	0	0	0	0	0
OTU_22	Bacteria	Firmicutes	Bacilli	Bacillales	Planococcaceae		8.71916e-05	0.000193155	0.0122478	0	0.000599553	0.00523642	0.000160944	0.00854253	0	0	0.00463218	8.97465e-05	0.0020962	0.0201108	0.000141603	0.0020761	0.000109045	0.00746667	0.000388312	0.000177253	0.000923788	0.0012808	0.000418177	0	0.00440053	0.000527108	0.0202578	0.000135166	0.000113244	0	6.1252e-05	0.000237464	0	4.3756e-05	0	0.0451457	0.014114	0.00325851	0	0.00552014	0.001726	0.00176286	0
OTU_41	Bacteria	Firmicutes	Bacilli	Bacillales	Planococcaceae		0	0	0	0	0	0	0	0	0	0	0.00022058	0	0	0.00111727	4.7201e-05	0	5.45227e-05	0	0	0	0	0	0	0	0	0.00704066	0	0	0	0	0	0	0	0	0	0	0	0.0205855	0	0	0	0	0
OTU_90	Bacteria	Firmicutes	Bacilli	Bacillales	Planococcaceae		0	0	0	0	0	0	0	0	0	0	0	0	0	0	0	0	0	0	0	0	0	0	0	0	0	0	0	0	0	0	0	0	0	0	0	0	0	0	0	0	0	0	0
OTU_8	Bacteria	Firmicutes	Bacilli	Bacillales	Staphylococcaceae	Staphylococcus	0.000130787	0	0	0	0	0.000261821	5.36481e-05	5.24082e-05	0	0	0	4.48732e-05	0.000339924	8.93815e-05	0.000141603	0.00652487	0.00981408	0.0212148	0.00509659	0.0011226	7.69823e-05	0.0146377	0.0578478	0	0.0255314	0.0157003	0.00517645	0.188376	0.00141555	0.598464	0.0739312	0.00126647	0.668185	0.0909688	0.46954	0.000905934	0.0124668	0.227423	0.0333556	0.042584	0.184969	0.0824711	0.00104835
OTU_91	Bacteria	Firmicutes	Bacilli	Lactobacillales	Streptococcaceae	Streptococcus	0	0	0	0	0	0	0	0	0	0	0	0	0	0	0	0	0	0	0	0	0	0	0	0	0	0	0	0	0	0	0	0	0	0	0	0	0	0	0	0	0	0	0
OTU_93	Bacteria	Firmicutes	Bacilli	Lactobacillales	Streptococcaceae	Streptococcus	0	0	0	0	0	0	0	0	0	0	0	0	0	0	0	0	0	0	0	0	0	0	0	0	0	0	0	0	0	0	0	0	0	0	0	0	0	0	0	0	0	0	0
OTU_57	Bacteria	Firmicutes	Bacilli	Lactobacillales	Streptococcaceae	Streptococcus	0	0	0	0	0	0	0	0	0	0	0	0	0	0	0	0	0	0	0	0	0	0	0	0	0	0	0	0	0	0	0	0	0	0	0	0	0	0	0	0	0	0	0
OTU_62	Bacteria	Firmicutes	Bacilli	Lactobacillales	Streptococcaceae	Streptococcus	0	0	0	0	0	0	0	0	0	0	0	0	0	0	0	4.23693e-05	0	0.000177778	0	0	0	0	0	0	0	0	0	0	0	0	0	0	0	0	0	0	0	0	0	6.5716e-05	7.19166e-05	0	6.16675e-05
OTU_72	Bacteria	Firmicutes	Clostridia	Clostridiales	Family XI	Parvimonas	0	0	0	0	0	0	0	0	0	0	0	0	0	0	0	0	0	0	0	0	0	6.09905e-05	0	0	0	0	0	0	0	0	0	0	0	0	0	0	0	0	0	0	0	0	0
OTU_102	Bacteria	Firmicutes	Clostridia	Clostridiales	Lachnospiraceae		0	0	0	0	0	0	0	0	0	0	0	0	0	0	0	0	0	0	0	0	0	0	0	0	0	0.000150602	0	0	0	0	0	0	0	0	0	0	0	0	0	0	0	0	0
OTU_33	Bacteria	Firmicutes	Clostridia	Clostridiales	Lachnospiraceae		0	0	0	0	0.000163514	0	5.36481e-05	0.01001	0	0	0	0	0	0	0	0	0	0	0	0	0	0	0	0	0	0	0	0	0	0	0	0	0	0	0	0	0	0	0	0	0	0	0
OTU_40	Bacteria	Firmicutes	Clostridia	Clostridiales	Lachnospiraceae		0	0	0	0	0	0	0	0	0	0	0	0	0	0	0	0	0	0	0	0	0	0	0	0	0	0	0	0	0	0	0	0	0	0	0	0	0	0	0	0	0	0	0
OTU_35	Bacteria	Firmicutes	Negativicutes	Selenomonadales	Veillonellaceae	Pelosinus	0	0	0	0	0	0	0	0	0	0	0	0	0	0	0	0	0	0	0	0	0	0	0	0	0	0	0	0	0	0	0	0	0	0	0	0	0	0	0	0	0	0	0
OTU_116	Bacteria	Firmicutes	Negativicutes	Selenomonadales	Veillonellaceae	Selenomonas	0	0	0	0	0	0	0	0	0	0	0	0	0	0	0	0	0	0	0	0	0	0	0	0	0	0	0	0	0	0	0	0	0	0	0	0	0	0	0	0	0	0	0
OTU_111	Bacteria	Firmicutes	Negativicutes	Selenomonadales	Veillonellaceae	Veillonella	0	0	0	0	0	0	0	0	0	0	0	0	0	0	0	0	0	0	0	0	0	0	0	0	0	0	0	0	0	0	0	0	0	0	0	0	0	0	0	0	0	0	0
OTU_55	Bacteria	Firmicutes	Negativicutes	Selenomonadales	Veillonellaceae	Veillonella	0	0	0	0	0	0	0	0	0	0	0	0	0	0	0	4.23693e-05	0	0	0	0	0	0	0	0	0	0	0	0	0	0	0	0	0	0	0	0	0	0	5.55926e-05	0	0	7.6646e-05	0
OTU_78	Bacteria	Fusobacteria	Fusobacteriia	Fusobacteriales	Fusobacteriaceae	Fusobacterium	0	0	0	0	0	0	0	0	0	0	0	0	0	0	0	0	0	0	0	0	0	0	0	0	0	0	0	0	0	0	0	0	0	0	0	0	0	0	0	0	0	0	0
OTU_97	Bacteria	Fusobacteria	Fusobacteriia	Fusobacteriales	Leptotrichiaceae	Leptotrichia	0	0	0	0	0	0	0	0	0	0	0	0	0	0	0	0	5.45227e-05	0	0	0	0	0	0	0	0	0	0	0	0	0	0	0	0	0	0	0	0	0	0	0	0	0	0
OTU_114	Bacteria	Fusobacteria	Fusobacteriia	Fusobacteriales	Leptotrichiaceae	Leptotrichia	0	0	0	0	0	0	0	0	0	0	0	0	0	0	0	0	0	0	0	5.90842e-05	0	0	0	0	0	0	0	0	0	0	0	0	0	0	0	0	0	0	0	0	0	0	0
OTU_36	Bacteria	Gemmatimonadetes	Gemmatimonadetes	Gemmatimonadales	Gemmatimonadaceae	Gemmatimonas	0	0	0	0	0	0	0	0	0	0	0	0	0	0	0	0	0	0	0	0	0	0	0	0	0	0	0	0	0	0	0	0	0	0	0	0	0	0	0	0	0	0	0
OTU_51	Bacteria	Gemmatimonadetes	Gemmatimonadetes	Gemmatimonadales	Gemmatimonadaceae	uncultured	0	0	0	0	0	0	0	0	0	0	0	0	0	0	0	0	0	0	0	0	0	0	0	0	0	0	0	0	0	0	0	0	0	0	0	0	0	0	0	0	0	0	0
OTU_108	Bacteria	Proteobacteria	Alphaproteobacteria	Caulobacterales	Caulobacteraceae		0	0	0	0	0	0	0	0	0	0	0	0	0	0	0	0	0	0	0	0	0.000538876	0.000365943	6.96961e-05	0	0	0	0.000348415	0	0	0	6.1252e-05	0	0	0	0	0	0	0	0.00022237	0	0	0	0
OTU_46	Bacteria	Proteobacteria	Alphaproteobacteria	Caulobacterales	Caulobacteraceae		0	0	0	0	0	0	0	0	0	0	0	0	0	0	0	0	0	0	0	0	0	0	0	0	0	0	0	0	0	0	0	0	0	0	0	0	0	0	0	0	0	0	0
OTU_56	Bacteria	Proteobacteria	Alphaproteobacteria	Caulobacterales	Caulobacteraceae		0	0	0	0	0	0	0	0	0	0	0	0	0	0	0	0	0	0	0	0	0	0	0	0	0	0	0	0	0	0	0	0	0	0	0	0	0	0	0	0	0	0	0
OTU_12	Bacteria	Proteobacteria	Alphaproteobacteria	Caulobacterales	Caulobacteraceae	Brevundimonas	0	0	5.14615e-05	0	0	0	0	0	0	0	0	0	5.6654e-05	0	4.7201e-05	0.000635539	0.00430729	0	0.000145617	0.000236337	0.0539646	0.11637	0.00118483	5.96979e-05	0.00103786	0.000225904	0.289334	4.50552e-05	0	0	0.0178243	3.95773e-05	0	0	6.07977e-05	0	0	0.000103445	0.0151768	0.000460012	0.00755124	0	0
OTU_27	Bacteria	Proteobacteria	Alphaproteobacteria	Caulobacterales	Caulobacteraceae	Brevundimonas	0	0	0	0	0	0	0	0	0	0	0	0	0	0	0	0	0	0	0	0	0	0	0	0	0	0	0	0	0	0	0	0	0	0	0	0	0	0	0	0	0	0	0
OTU_48	Bacteria	Proteobacteria	Alphaproteobacteria	Caulobacterales	Caulobacteraceae	Caulobacter	0	0	0	0	0	0	0	0	0	0	0	0.000179493	0	0	0	0	0	0	0	0	0	0	0	0	0	0	0	0	0	0	0	0	0	0	0	0	0	0	0	0	0	0	0
OTU_96	Bacteria	Proteobacteria	Alphaproteobacteria	Caulobacterales	Caulobacteraceae	Caulobacter	0	0	0	0	0	0	0	0	0	0	0	0	0	0	0	0	0	0	0	0	0	0	0	0	0	3.76506e-05	0	0	0	0	0	0	0	0	0	0.000150989	0	0	0	0	0	0	0
OTU_101	Bacteria	Proteobacteria	Alphaproteobacteria	Caulobacterales	Caulobacteraceae	Phenylobacterium	0	0	0	0	0	0	0	0	0	0	0	0	0	0	0	0	0	0	0	0	0	0	0.000278784	0	0.000124543	0	0	0	0	0.000483325	0	0	0	0	0	0	0	0	0	0.000197148	0	0.000613168	0
OTU_10	Bacteria	Proteobacteria	Alphaproteobacteria	Caulobacterales	Caulobacteraceae	Phenylobacterium	0	0	5.14615e-05	5.69314e-05	0	0.000104728	0	0	4.86121e-05	0	0	0	0.00390913	0.00156418	0.000424809	0.00228794	0.00163568	0.00592593	0.00320357	0	0.00115473	0.000121981	0.000348481	0	0.000166058	0.000150602	0.000447962	0	0.000113244	0.000214811	0	3.95773e-05	0.000195963	4.3756e-05	6.07977e-05	0	0.000374378	0.00108617	0.00116744	0.000854308	0.00237325	0.00544186	0.00141835
OTU_60	Bacteria	Proteobacteria	Alphaproteobacteria	Caulobacterales	Caulobacteraceae	Phenylobacterium	0	0	0	0	0	0	0	0	0	0	0	0	0	0	0	4.23693e-05	0	0	0	0	0	0	0.0683719	0	0	3.76506e-05	0	0	0	0.0298588	0	0	9.79816e-05	0	0	0	0	0	0	0.0759677	7.19166e-05	0.0612401	0.000308337
OTU_52	Bacteria	Proteobacteria	Alphaproteobacteria	Rhizobiales			0	0	0	0	0	0	0	0	0	0	0	0	0	0	0	0	0	0	0	0	0	0	0	0	0	0	0	0	0	0	0	0	0	0	0	0	0	0	0	0	0	0	0
OTU_19	Bacteria	Proteobacteria	Alphaproteobacteria	Rhizobiales	Bradyrhizobiaceae		0	0	0	0	0	0	5.36481e-05	0	0	0	0	0	0	0	0	0	0	5.92593e-05	0	0	0	0.000121981	0	0.0228046	4.15144e-05	0	0	9.01104e-05	0	0	0	0	0	0.0209154	0	0	0	0	0	0	0	0	0
OTU_117	Bacteria	Proteobacteria	Alphaproteobacteria	Rhizobiales	F0723	uncultured bacterium	0	0	0	0	0	0	0	0	0	0	0	0	5.6654e-05	0	0	0	0	0	0	0	0	0	0.00264845	5.96979e-05	0	0	0	0	0	0.000483325	0	3.95773e-05	0	0	0	0	0	0	0	0	7.19166e-05	0	0
OTU_28	Bacteria	Proteobacteria	Alphaproteobacteria	Rhizobiales	F0723	uncultured bacterium	0	0	0	0	0	0.000157093	0	0	0	0	0	0	0	0	0	0.000211846	0	0	9.7078e-05	0.000472674	0	0.000121981	0.000209088	0.00549221	0.000207572	0	0	0	0	0.000161108	0	0.000672814	0.00205761	0.00043756	0	0	3.74378e-05	5.17224e-05	0.00105626	6.5716e-05	0.00136641	0.00735801	6.16675e-05
OTU_30	Bacteria	Proteobacteria	Alphaproteobacteria	Rhizobiales	Hyphomicrobiaceae	Hyphomicrobium	0	0	0	0	0.000327029	0	0.00026824	0	0	0	0.000165435	8.97465e-05	0	0	0	0	0	0	0	0	0	0	0	0	4.15144e-05	0	0	0	0	0	0	0	0	0	0	0	0	0	0	0	0	0	0
OTU_31	Bacteria	Proteobacteria	Alphaproteobacteria	Rhizobiales	Hyphomicrobiaceae	Hyphomicrobium	0	0	0	0.00426985	0.00528697	0.000628371	0.000160944	5.24082e-05	4.86121e-05	0.027027	0.0468181	0.0292573	0	0	0	0	0	0	0	0	0	0	0	0	0	0	0	0	0	0	0	0	0	0	0	0	0	0	0	0	0	0	0
OTU_66	Bacteria	Proteobacteria	Alphaproteobacteria	Rhizobiales	Hyphomicrobiaceae	Pedomicrobium	0	0	0	0	0	0	5.36481e-05	0	0	0	0	4.48732e-05	0	0	0	0	0	0	0	0	0	0	0	0	0	0	0	0	0	0	0	0	0	0	0	0	0	0	0	0	0	0	0
OTU_86	Bacteria	Proteobacteria	Alphaproteobacteria	Rhizobiales	Methylobacteriaceae	Methylobacterium	0	0	0	0	0	0	0	0	0	0	0	0	0	0	0	4.23693e-05	0	0	4.8539e-05	0	0	0	0	0	4.15144e-05	0	0	0	0	0	0	0	0	0	0	0	0	0	0	0	0	0	0
OTU_87	Bacteria	Proteobacteria	Alphaproteobacteria	Rhizobiales	Xanthobacteraceae	uncultured	0	0	0	0	0	0	0	0	0	0	0	0	0	0	0	0	0	0	0	0	0	0	0	0	0	0	0	0	0	0	0	0	0	0	0	0	0	0	0	0	0	0	0
OTU_58	Bacteria	Proteobacteria	Alphaproteobacteria	Rhodospirillales	Rhodospirillales Incertae Sedis	Reyranella	0	0	0	0	0	0	0	0	0	0	0	0	0	0	0	0	0	0	0	0	0	0	0	0	0	0	0	0	0	0	0	0	0	0	0	0	0	0	0	0	0	0	0
OTU_61	Bacteria	Proteobacteria	Alphaproteobacteria	Rickettsiales	mitochondria	Vermamoeba vermiformis	0	0	0	0	0	0	0	0	0	0	0	0	0	0	0	0	0	0	0	0	0	0	0	0	0	0	0	0	0	0	0	0	0	0	0	0	0	0	0	0	0	0	0
OTU_104	Bacteria	Proteobacteria	Alphaproteobacteria	Sphingomonadales			0	0	0	0	0	0	0	0	0	0	0	4.48732e-05	0.000339924	0.00746335	0.00226565	0.0115244	0.0122676	0.00651852	0.00393166	0.00395864	0	0	0	0	0.00705746	0.00843373	0	0.00373958	5.66219e-05	0.00118146	0.00110254	0.00237464	0.000391926	0.000481316	0.000121595	0	0.00891019	0.00429296	0	0.000131432	0.00143833	0	0
OTU_5	Bacteria	Proteobacteria	Alphaproteobacteria	Sphingomonadales			0.000348766	3.86309e-05	5.14615e-05	5.69314e-05	0.000163514	0.000104728	0.000160944	0.000104816	0	0.027027	0.00011029	0	0.00679848	0.21608	0.211791	0.480934	0.429639	0.350696	0.619649	0.490517	0.000230947	0.000304952	0.00090605	0.000119396	0.649244	0.305497	0.000298641	0.407569	0.220769	0.227807	0.0601495	0.750544	0.203312	0.585893	0.00079037	0.000452967	0.0767848	0.0994104	5.55926e-05	0.00223434	0.200863	7.6646e-05	0.000123335
OTU_80	Bacteria	Proteobacteria	Alphaproteobacteria	Sphingomonadales			0	0	0	0	0	0	0	0	0	0	0	0	0	0	0	0	0	0	0	0	0	0	0	0	0	0	0	0	0	0	0	0	0	0	0	0	0	0	0	0	0	0	0
OTU_85	Bacteria	Proteobacteria	Alphaproteobacteria	Sphingomonadales			0.00431598	0.00451982	0.00247015	0.00472531	5.45048e-05	0.000628371	0.000214592	0.000209633	0.00855573	0	0.000386015	0.000224366	0	4.46907e-05	0.00325687	0	0	0.000118519	0	5.90842e-05	0.000230947	0.000548914	0.000836353	0.00107456	0	0	0	0.00256815	0	0.000268514	0	0	0	4.3756e-05	0	0	0	0	0.00489215	0	0.000287666	0.000153292	0.00444006
OTU_89	Bacteria	Proteobacteria	Alphaproteobacteria	Sphingomonadales			0	0	0	0	0	0	0	0	0	0	5.5145e-05	0.00125645	0.000226616	0.0107258	0.00259605	0.0232184	0.0214819	0.0126815	0.00732939	0.0070901	0	0.000182971	0	0.00459674	0.0143225	0.016491	0	0.00567695	0.00028311	0.000912948	0.00189881	0.00375984	0.000832843	0.000918876	0	0	0.00891019	0.00641357	0	0.00065716	0.00201366	0	0
OTU_9	Bacteria	Proteobacteria	Alphaproteobacteria	Sphingomonadales			0.461374	0.561616	0.505455	0.201309	0.0044694	0.031628	0.0111588	0.0379435	0.103641	0.027027	0.024705	0.00560915	0	0.00277083	0.497498	4.23693e-05	5.45227e-05	0.00717037	0.000388312	0.000236337	7.69823e-05	0.000121981	0.000139392	0	0.00037363	0	0	0.148727	0.000339732	0.018796	0.00814651	0.000316619	0	0	6.07977e-05	0.0123811	0.000262064	5.17224e-05	0.347843	0.00663731	0.0524991	0.077719	0.322706
OTU_15	Bacteria	Proteobacteria	Alphaproteobacteria	Sphingomonadales	Sphingomonadaceae		0	0	0	0	0	0	0	0	0	0	0.000606595	0.030783	0	0	0	0.000381324	5.45227e-05	0	0	0	0	0.00341547	0.000139392	0.0507432	0	0	0	0	5.66219e-05	0.000214811	0.00490016	0	0	0	0	0	0	0	0	0.0094631	0	0	0
OTU_67	Bacteria	Proteobacteria	Alphaproteobacteria	Sphingomonadales	Sphingomonadaceae		8.71916e-05	0	0	0.000569314	0.00277975	0.00230403	0.00225322	0.000890939	0.00384036	0	0.00198522	0.00282701	0.000113308	0	0	0	0	0	0	0	0	0	6.96961e-05	0.000477583	0	0	0	0	0	0	0	0	0	0	0	0	0	0	0	6.5716e-05	0	7.6646e-05	0
OTU_44	Bacteria	Proteobacteria	Alphaproteobacteria	Sphingomonadales	Sphingomonadaceae		0	0	0	0.00039852	5.45048e-05	0.000733099	0.000107296	0	0.000340285	0	5.5145e-05	0.000358986	0.00339924	0.00294959	0.000991221	4.23693e-05	0.000654272	0	0.000776624	0.000118168	0.000307929	6.09905e-05	0.0234876	0	4.15144e-05	0.000112952	0.00856105	0.000180221	0.000113244	0	0.0237658	7.91546e-05	0.000293945	0	0	0	0	0.000413779	0.0225706	0.000722876	0.00560949	0.0508929	0.00129502
OTU_107	Bacteria	Proteobacteria	Alphaproteobacteria	Sphingomonadales	Sphingomonadaceae	Sphingobium	0.000130787	0.000386309	0.000463154	0.00119556	0.000436039	0.000785464	0.000751073	0.00057649	0.00486121	0	0.000606595	0.00210904	0	0	0	0	0	0	0	0	0	0.000121981	6.96961e-05	0.00107456	0	0	0	0	0	5.37028e-05	0	0	0	0	0.000425584	0	0	0	5.55926e-05	0	0	0	0
OTU_110	Bacteria	Proteobacteria	Alphaproteobacteria	Sphingomonadales	Sphingomonadaceae	Sphingobium	0.000653937	0.000270416	0.000308769	0.00125249	0.000981087	0.00115201	0.00177039	0.000366857	0.00534733	0	0.000496305	0.00192955	0	0	0	0	5.45227e-05	0	4.8539e-05	5.90842e-05	0.00161663	0.00152476	0.00104544	0.0109247	0	0	0	4.50552e-05	0	0	0	0	0	0	0.0025535	0	0	0	5.55926e-05	6.5716e-05	0	0	6.16675e-05
OTU_118	Bacteria	Proteobacteria	Alphaproteobacteria	Sphingomonadales	Sphingomonadaceae	Sphingobium	4.35958e-05	0	0	0.000341588	0.000163514	0.000104728	0.00026824	0.000157224	0.00102085	0	0	0.00013462	0	0	0	4.23693e-05	0	5.92593e-05	0	0	0.000538876	0.000975848	0.000418177	0.00459674	0	0	0	0	0	0	6.1252e-05	3.95773e-05	0	0	0.00310068	0	0	0	5.55926e-05	6.5716e-05	7.19166e-05	0	0.000123335
OTU_6	Bacteria	Proteobacteria	Alphaproteobacteria	Sphingomonadales	Sphingomonadaceae	Sphingobium	0.0155637	0.0142934	0.00699876	0.101452	0.170873	0.0270723	0.127575	0.00859494	0.122746	0.0540541	0.0481968	0.144941	0.4619	0.30993	0.0542339	0.294763	0.27016	0.143704	0.0434424	0.0374003	0.186528	0.0739205	0.0771536	0.255925	0.097725	0.170971	0.0612214	0.0361793	0.000962573	0.0095591	0.138552	0.0199074	0.010876	0.00415682	0.0438351	0.11762	0.557224	0.226854	0.130365	0.337452	0.0470334	0.0586342	0.127713
OTU_29	Bacteria	Proteobacteria	Alphaproteobacteria	Sphingomonadales	Sphingomonadaceae	Sphingomonas	0	0	0	0	0	0	0	0	0	0	0	0	0	0	0	0	0	0	0	0	0	0	0	0	0	0	0	0	0	0	0	0	0	0	0	0	0	0	0	0	0	0	0
OTU_71	Bacteria	Proteobacteria	Alphaproteobacteria	Sphingomonadales	Sphingomonadaceae	Sphingomonas	0	0	0	0	0	0	0	0	0	0	0	0	0	0	0	0	0	0	0	0	0	0	0	0	0	3.76506e-05	0	0	0	0	0	0	0	0	0	0	0	0	0	0	0	0	0
OTU_23	Bacteria	Proteobacteria	Alphaproteobacteria	Sphingomonadales	Sphingomonadaceae	Sphingomonas	0	0	0	0	0	0	0	0	0	0	0	0	0	0	0.000330407	0	0	0	0	0	0	0	0	0.00029849	4.15144e-05	0.014006	0	0	0	5.37028e-05	6.1252e-05	0	0	0	0	0	0	0	0	0	0	0	0
OTU_83	Bacteria	Proteobacteria	Alphaproteobacteria	Sphingomonadales	Sphingomonadaceae	Sphingomonas	0	0	0	0	0	0	0	0	0	0	0	0	0	0	0	0	0	0	0	0	0	0	0	0	0	0	0	0	0	0	0	0	0	0	0	0	0	0	0	0	0	0	0
OTU_16	Bacteria	Proteobacteria	Alphaproteobacteria	Sphingomonadales	Sphingomonadaceae	Sphingopyxis	0	0	0	0	0	0	0	0	0.000194448	0	0	0.000269239	0	0	0	0	0	0	0	0	0	0	0	0	0	0	0	4.50552e-05	0	0	0	0	0	0	0	0	0	0	0	0	0	0	0
OTU_4	Bacteria	Proteobacteria	Alphaproteobacteria	Sphingomonadales	Sphingomonadaceae	Sphingopyxis	0.00693173	0.00455845	0.0335014	0.0794193	0.315474	0.62015	0.260139	0.25245	0.128385	0.243243	0.489247	0.22118	0.00883803	0.000670361	0.000141603	0	5.45227e-05	0	9.7078e-05	0	0.00816012	0.00750183	0.00913019	0.00943227	0.000871803	0	4.97735e-05	0	0	0.00037592	0	3.95773e-05	0	8.7512e-05	0.000121595	0	3.74378e-05	0.000103445	0.000945074	0.0136032	0.00021575	0.0154825	0.00135668
OTU_47	Bacteria	Proteobacteria	Alphaproteobacteria	Sphingomonadales	Sphingomonadaceae	Sphingopyxis	8.71916e-05	0.000618095	0.00128654	0.00910902	0.011228	0.00450333	0.0181867	0.103873	0.0322298	0.0540541	0.0185287	0.150729	0	0	0	0	0	0	0	0	0	0	0	5.96979e-05	0.000124543	0	0	0	0	0	0	0	0	0	0.00218872	0	0	0	0	0	0	0	0
OTU_25	Bacteria	Proteobacteria	Betaproteobacteria	Burkholderiales			0.00797803	0.00753303	0.0109098	0.0114432	0.00245272	0.00125674	0.000697425	0.00157224	0.011278	0	0.00077203	0.00287189	0	0	0	0	0	0	0	0	0	0	0	0	0	0	0	0	5.66219e-05	0	0	0	0	0	0	0	0	0	0	0.00118289	0.00266091	0.000153292	0.00351505
OTU_13	Bacteria	Proteobacteria	Betaproteobacteria	Burkholderiales	Burkholderiaceae	Cupriavidus	0	0	0	0	0	0	0	0	0	0	0	0	0	0	0	0	0	0	0	0	0	0	0	0	0	0	0	0.000270331	0.690052	5.37028e-05	0.000245008	0	0	4.3756e-05	6.07977e-05	0	0	0	0	0	0	0	0
OTU_79	Bacteria	Proteobacteria	Betaproteobacteria	Burkholderiales	Burkholderiaceae	Cupriavidus	0	0	0	0	0	0	0	0	0	0	0	0	0	0	0	0	0	0	0	0	0	0	0	0	0	0	0	0	0	0	0	0	0	0	0	0	0	0	0	0	0	0	0
OTU_70	Bacteria	Proteobacteria	Betaproteobacteria	Burkholderiales	Burkholderiaceae	Ralstonia	0	0	0	0	0	0	0	0	0	0	0	0	0	0	0	0	0	0	0	0	0	0	0	0	8.30289e-05	0	0	0	0	0	6.1252e-05	0	0	0	0	0.000150989	0	0	0	6.5716e-05	0	0	0
OTU_106	Bacteria	Proteobacteria	Betaproteobacteria	Burkholderiales	Comamonadaceae		0.00161304	0.00150661	0.000669	0.000512383	0.00970186	0.0035084	0.00295064	0.00241078	0.00165281	0	0.0116356	0.0013462	0.0107643	0.0100554	0.00269046	0.0123295	0.00179925	0.000414815	9.7078e-05	0	0.000230947	0.000243962	6.96961e-05	0	0.00244935	0.00184488	0.00826241	0.000991214	5.66219e-05	0.000214811	0.000122504	7.91546e-05	0.000342936	0.000262536	0	0	0.00239602	0.000931002	0	0	0	0.00781789	0.0146769
OTU_109	Bacteria	Proteobacteria	Betaproteobacteria	Burkholderiales	Comamonadaceae		0.00911152	0.0042494	0.00288184	0.00461144	0.067586	0.0228832	0.0197425	0.0122635	0.00617374	0.027027	0.10064	0.0124299	0.10668	0.158563	0.0166147	0.102788	0.0266616	0.00711111	0.00131055	0.000531758	0.00631255	0.00317151	0.00160301	0.000417885	0.0233311	0.0127636	0.0857598	0.00531651	0.000962573	0.00295365	0.00116379	0.000712392	0.00362532	0.00144395	6.07977e-05	0.00105692	0.0184194	0.00724113	0.000111185	0.000460012	0.000862999	0.0539588	0.127097
OTU_3	Bacteria	Proteobacteria	Betaproteobacteria	Burkholderiales	Comamonadaceae		0.489406	0.399173	0.421521	0.556504	0.388238	0.264754	0.482994	0.532572	0.56006	0.378378	0.226481	0.330985	0.338168	0.244816	0.148258	0.0561817	0.0575214	0.075437	0.039899	0.0102216	0.0143957	0.032203	0.0546418	0.0128351	0.170292	0.373306	0.482057	0.168687	0.00322745	0.0236292	0.0528605	0.0274271	0.0678033	0.0343485	0.00182393	0.721878	0.275242	0.375194	0.206582	0.151607	0.154764	0.460489	0.294586
OTU_53	Bacteria	Proteobacteria	Betaproteobacteria	Burkholderiales	Comamonadaceae		0	0	0	0	0	0	0	0	0	0	0	0	0	0	0	0	0	0	0	0	0	0	0	0	8.30289e-05	0	0.0224479	0	0	0	0	0	0	0	0	0	0	0	0	0	0	0	0
OTU_68	Bacteria	Proteobacteria	Betaproteobacteria	Burkholderiales	Comamonadaceae		0	3.86309e-05	0.000102923	5.69314e-05	0.000272524	0	0.000107296	0.000733714	0.000145836	0	0.00011029	4.48732e-05	0.00028327	4.46907e-05	4.7201e-05	0	0	0.000118519	9.7078e-05	0	0.000153965	6.09905e-05	0.000139392	0.0261477	0	0	0	0	0	0	0	0	0	0	0	0	0	5.17224e-05	0.000166778	0.149504	0.0230133	0	6.16675e-05
OTU_74	Bacteria	Proteobacteria	Betaproteobacteria	Burkholderiales	Comamonadaceae		4.35958e-05	0	0	0.00039852	0.000817572	0	5.36481e-05	0.00120539	4.86121e-05	0	0.00143377	0	0.00305932	0.000446907	0	0	0.00278066	0.00207407	0.00097078	0.00378139	0.00600462	0.00164674	0.00494842	0.000716375	0	7.53012e-05	4.97735e-05	0	0.000113244	0	0	0	0	0	0	0	0	0	0.00111185	0.00322008	0.000647249	0	0.000308337
OTU_7	Bacteria	Proteobacteria	Betaproteobacteria	Burkholderiales	Comamonadaceae	Aquabacterium	0.000610341	3.86309e-05	0.000102923	0.0204953	0.000763068	0.00267058	0.0552575	0.000524082	0.00772933	0	0.00154406	0.0388153	0.00130304	0.00201108	0.0386104	0.00194899	0.0901259	0.288948	0.0932434	0.331699	0.444188	0.501037	0.468428	0.27867	0.00103786	0.0625377	0.00288686	0.0146429	0.00277447	0.000107406	0.12526	0.0810148	0.0010778	0.0178962	0.000182393	0.0720217	0.00127288	0.000724113	0.219313	0.0996911	0.0749371	0.00114969	0.0022817
OTU_21	Bacteria	Proteobacteria	Betaproteobacteria	Methylophilales	Methylophilaceae	Methylophilus	4.35958e-05	0	0	0.000683177	0.00414237	5.23642e-05	0.000160944	0	0.000243061	0	0	0	0	0	0	0	0	0	0	5.90842e-05	0	0	0	0	0	0	0	0	0	0	0	0	0	0	0	0	0	0	0	0	0	0	0
OTU_82	Bacteria	Proteobacteria	Betaproteobacteria	Neisseriales	Neisseriaceae	Neisseria	0	0	0	0	0	0	0	0	0	0	0	0	0	0	0	4.23693e-05	0	0	0	5.90842e-05	0	0	6.96961e-05	0	0	0	0	0	0	0	0	0	0	0	0	0	0	0.000103445	0	0	0.000143833	7.6646e-05	0
OTU_32	Bacteria	Proteobacteria	Betaproteobacteria	Nitrosomonadales	Nitrosomonadaceae	uncultured	0	0	0	0	0	0	0	0	0	0	0	0	0	0	0	0	0	0	0	0	0	0	0	0	0	0	0	0	0	0	0	0	0	0	0	0	0	0	0	0	0	0	0
OTU_11	Bacteria	Proteobacteria	Betaproteobacteria	Rhodocyclales	Rhodocyclaceae	Methyloversatilis	4.35958e-05	0	0	5.69314e-05	0.0119366	0.000209457	0.000590129	0.0226403	9.72242e-05	0	0.0173707	0.00161544	0.0436236	0.00715052	0.000188804	0.000338954	0.0564309	0.0597926	0.0181536	0.0648744	0.120708	0.0340937	0.0932534	5.96979e-05	0	0.000301205	0	0	5.66219e-05	0	0	7.91546e-05	0	0.000131268	0	0	3.74378e-05	0	0.012286	0.0116317	0.00115067	0	0.00074001
OTU_98	Bacteria	Proteobacteria	Epsilonproteobacteria	Campylobacterales	Campylobacteraceae	Campylobacter	0	0	0	0	0	0	0	0	0	0	0	0	0	0	0	0	0	0	0	0	0	0	0	0	0	0	0	0	0	0	0	0	0	0	0	0	0	0	0	0	0	0	0
OTU_43	Bacteria	Proteobacteria	Gammaproteobacteria	Alteromonadales	Shewanellaceae	Shewanella	4.35958e-05	0	0	5.69314e-05	5.45048e-05	5.23642e-05	0.000107296	5.24082e-05	0	0	5.5145e-05	4.48732e-05	0	4.46907e-05	9.4402e-05	8.47386e-05	0	0.000118519	4.8539e-05	0	7.69823e-05	0.000182971	6.96961e-05	5.96979e-05	0	0	4.97735e-05	0	0	0	0.000245008	3.95773e-05	0	0	0.000303988	0.00226483	7.48755e-05	0	0	0.000131432	0	0	0
OTU_113	Bacteria	Proteobacteria	Gammaproteobacteria	Cardiobacteriales	Cardiobacteriaceae	Cardiobacterium	0	0	0	0	0	0	0	0	0	0	0	0	0	0	0	0	0	0	4.8539e-05	0	0	0	0	0	0	0	0	0	0	0	0	0	0	0	0	0	0	0	0	0	0	0	0
OTU_69	Bacteria	Proteobacteria	Gammaproteobacteria	Chromatiales	Chromatiaceae	Rheinheimera	0	0	0	0	0	0	0	0.00157224	0	0	0	0	0	0	0	0	0	0	0	0	0	0	0	0	0	0	0	0	0	0	0	0	0	0	0	0	0	0	0	0	0	0	0
OTU_99	Bacteria	Proteobacteria	Gammaproteobacteria	Legionellales	Coxiellaceae	uncultured	0	0	0	0	0	0	0	0	0	0	0	0	0	0	0	0	0	0	0	0	0	0	0	0	0	0	0	0	0	0	0	0	0	0	0	0	0	0	0	0	0	0	0
OTU_42	Bacteria	Proteobacteria	Gammaproteobacteria	Oceanospirillales	Halomonadaceae	Halomonas	0	0	0	5.69314e-05	0.00010901	0.000157093	0.000107296	0.000209633	9.72242e-05	0	0.00022058	4.48732e-05	0.000113308	0.000402217	0.000236005	0.000338954	0	5.92593e-05	0	5.90842e-05	0.000153965	6.09905e-05	0.000209088	5.96979e-05	0.000290601	0.000112952	0.000199094	0	0.000226488	5.37028e-05	0.00104128	0.000158309	0	0.000175024	0.000182393	0.00513363	0.000112313	0.000206889	0	0.000131432	0.000287666	0	6.16675e-05
OTU_95	Bacteria	Proteobacteria	Gammaproteobacteria	Pasteurellales	Pasteurellaceae		0	0	0	0	0	0	0	0	0	0	0	0	0	0	0	0	0	0	0	0	0	0	0	0	0	0	0	0	0	0	0	0	0	0	0	0	0	0	0	0	0	0	0
OTU_73	Bacteria	Proteobacteria	Gammaproteobacteria	Pasteurellales	Pasteurellaceae	Haemophilus	0	0	0	0	0	0	0	0	0	0	0	0	5.6654e-05	0	0	0	0	0	0	0	0	0	0	0	0	0	0	0	0	0	0	0	0	0	0	0	0	0	0	0	0	0	0
OTU_38	Bacteria	Proteobacteria	Gammaproteobacteria	Pseudomonadales	Moraxellaceae	Acinetobacter	0	0	0	0	0	0	0	0	0	0	0	0	0	0	0	0	0	0	0	0	0	0	0	0	0	0	0	0	0	0	0	0	0	0	0	0	0	0	0	0	0	0	0
OTU_115	Bacteria	Proteobacteria	Gammaproteobacteria	Pseudomonadales	Moraxellaceae	Acinetobacter	0	0	0	0	0	0	0	0	0	0	0	0	0	0	0	0	0	0	0	0	0	0	0	0	0	0	0	0	0	0	0	0	0	0	0	0	0	0	0	0	0	0	0
OTU_18	Bacteria	Proteobacteria	Gammaproteobacteria	Pseudomonadales	Moraxellaceae	Perlucidibaca	0	0.000115893	0.000669	0.000284657	0	0.00822119	0.00756438	0	0.00092363	0.027027	0.00248153	0.00430783	0.000963118	0.000849124	0.000566412	0.00224557	0.000109045	5.92593e-05	9.7078e-05	0	0	0	0	0	0.000249087	0.00207078	0.000248868	0.000585718	0	0	0	0	0	0	0	0	0.00745011	0.0162925	0.000166778	0.000197148	0	0.000229938	0.000555007
OTU_75	Bacteria	Proteobacteria	Gammaproteobacteria	Pseudomonadales	Pseudomonadaceae	Pseudomonas	0	0	0	0	0	0	0	0	0	0	0	0	0	0	0	0	0	0	0	0	0	0	0	0	0	0	0	0	0	0	0	0	0	0	0	0.000301978	3.74378e-05	0	0	0	0	0	0
OTU_50	Bacteria	Proteobacteria	Gammaproteobacteria	Pseudomonadales	Pseudomonadaceae	Pseudomonas	0	0	0	0	0	5.23642e-05	5.36481e-05	0	0	0	0	4.48732e-05	0	4.46907e-05	0.000188804	0	0	0	0	0	0	0	0	0	0	0	0	0	0	0	0.000122504	0	0	0	0	0.00347275	0	0	0	0.000197148	0	0	0
OTU_26	Bacteria	Proteobacteria	Gammaproteobacteria	Xanthomonadales	Nevskiaceae	Nevskia	0.000610341	0.000733987	0	5.69314e-05	0.000490543	0.000261821	0.00563305	0.000104816	0	0	0.00011029	0.00013462	0	0	0	0	0	0	0	0	0	0	0	0	0	0	0	0	0	0	0	0	0.000293945	0	0	0	7.48755e-05	0	0	0	0	0	0.00129502
OTU_14	Bacteria	Proteobacteria	Gammaproteobacteria	Xanthomonadales	Xanthomonadaceae		8.71916e-05	0	0	0	0	0	0	0	0	0	0	0	0	0	0	0	0	0	0.14052	0	0	0	0	0	0	3.76506e-05	0	4.50552e-05	0.000792707	0	0.198089	0	4.89908e-05	0	0	0	0	0	0	0	0	0	0
OTU_24	Bacteria	Proteobacteria	Gammaproteobacteria	Xanthomonadales	Xanthomonadaceae	Silanimonas	0	0	0	0	0	0	0	0	0	0	0	0	5.6654e-05	0	0	0	0	0	0	0	0	0	0	0	0	0	0	0	0	0	0	0	0	0	0	0	0	0	0	0	0	0	0
OTU_65	Bacteria	Proteobacteria	Gammaproteobacteria	Xanthomonadales	Xanthomonadaceae	Silanimonas	0	0	0	0	0	0	0	0	0	0	0	0	0	8.93815e-05	9.4402e-05	0	0	0	0	0	0.000769823	0	0	0	0	0	0	0	0	0	0	0	0	0	0	0	0	0	0.000111185	0	0	0	0
OTU_88	Bacteria	Proteobacteria	Gammaproteobacteria	Xanthomonadales	Xanthomonadaceae	Stenotrophomonas	0	0	0	0	0	0	0	0	0	0	0	0	0	0	0	0	0	0	0	0	0	0	0	0	0	0	0	0	0	0	0	0	0	0	0	0.000150989	0	0	0	0	0	0	0
OTU_34	Bacteria	Proteobacteria	Gammaproteobacteria	Xanthomonadales	Xanthomonadaceae	Tahibacter	0	0	0	0	0	0	0	0	0	0	0	0	0	0	0	0	0	0	0	0	0	0	0	0	0	0	0	0	0	0	0	0	0	0	0	0	0	0	0	0	0	0	0
[truncated: 40 more columns]

## Sheet: Sheet2
	Taxonomy	D1	D2	D3	D4	D5	D6
	Bacteria	Actinobacteria	Actinobacteria	Actinomycetales	Actinomycetaceae	Actinomyces
	Bacteria	Actinobacteria	Actinobacteria	Corynebacteriales	Mycobacteriaceae	Mycobacterium	D_6__uncultured bacterium
	Bacteria	Actinobacteria	Actinobacteria	Micrococcales	Microbacteriaceae		D_6__
	Bacteria	Bacteroidetes	Bacteroidia	Bacteroidales	Porphyromonadaceae	Porphyromonas	D_6__uncultured bacterium
	Bacteria	Bacteroidetes	Bacteroidia	Bacteroidales	Porphyromonadaceae	Tannerella	D_6__uncultured bacterium
	Bacteria	Bacteroidetes	Bacteroidia	Bacteroidales	Prevotellaceae	Prevotella
	Bacteria	Bacteroidetes	Bacteroidia	Bacteroidales	Prevotellaceae	Prevotella	D_6__Prevotella sp. oral clone ASCG12
	Bacteria	Bacteroidetes	Flavobacteriia	Flavobacteriales	Flavobacteriaceae	Capnocytophaga	D_6__Capnocytophaga granulosa
	Bacteria	Bacteroidetes	Flavobacteriia	Flavobacteriales	Flavobacteriaceae	Chryseobacterium	D_6__
	Bacteria	Bacteroidetes	Sphingobacteriia	Sphingobacteriales	Chitinophagaceae	Hydrotalea	D_6__uncultured bacterium
	Bacteria	Bacteroidetes	Sphingobacteriia	Sphingobacteriales	Chitinophagaceae	Lacibacter	D_6__
	Bacteria	Bacteroidetes	Sphingobacteriia	Sphingobacteriales	Chitinophagaceae	Sediminibacterium
	Bacteria	Bacteroidetes	Sphingobacteriia	Sphingobacteriales	Chitinophagaceae	Sediminibacterium	D_6__Flexibacter sp. CF 1
	Bacteria	Bacteroidetes	Sphingobacteriia	Sphingobacteriales	env.OPS 17
	Bacteria	Firmicutes	Bacilli	Bacillales	Bacillaceae
	Bacteria	Firmicutes	Bacilli	Bacillales	Bacillaceae	Bacillus	D_6__Bacillus cereus
	Bacteria	Firmicutes	Bacilli	Bacillales	Bacillaceae	Fictibacillus
	Bacteria	Firmicutes	Bacilli	Bacillales	Family XI	Gemella	D_6__uncultured bacterium
	Bacteria	Firmicutes	Bacilli	Bacillales	Paenibacillaceae	Brevibacillus
	Bacteria	Firmicutes	Bacilli	Bacillales	Paenibacillaceae	Brevibacillus
	Bacteria	Firmicutes	Bacilli	Bacillales	Paenibacillaceae	Paenibacillus
	Bacteria	Firmicutes	Bacilli	Bacillales	Paenibacillaceae	Paenibacillus
	Bacteria	Firmicutes	Bacilli	Bacillales	Paenibacillaceae	Paenibacillus
	Bacteria	Firmicutes	Bacilli	Bacillales	Planococcaceae
	Bacteria	Firmicutes	Bacilli	Bacillales	Planococcaceae
	Bacteria	Firmicutes	Bacilli	Bacillales	Planococcaceae
	Bacteria	Firmicutes	Bacilli	Bacillales	Staphylococcaceae	Staphylococcus
	Bacteria	Firmicutes	Bacilli	Lactobacillales	Streptococcaceae	Streptococcus
	Bacteria	Firmicutes	Bacilli	Lactobacillales	Streptococcaceae	Streptococcus	D_6__
	Bacteria	Firmicutes	Bacilli	Lactobacillales	Streptococcaceae	Streptococcus	D_6__Streptococcus troglodytae
	Bacteria	Firmicutes	Bacilli	Lactobacillales	Streptococcaceae	Streptococcus	D_6__uncultured bacterium
	Bacteria	Firmicutes	Clostridia	Clostridiales	Family XI	Parvimonas	D_6__uncultured bacterium
	Bacteria	Firmicutes	Clostridia	Clostridiales	Lachnospiraceae
	Bacteria	Firmicutes	Clostridia	Clostridiales	Lachnospiraceae
	Bacteria	Firmicutes	Clostridia	Clostridiales	Lachnospiraceae
	Bacteria	Firmicutes	Negativicutes	Selenomonadales	Veillonellaceae	Pelosinus
	Bacteria	Firmicutes	Negativicutes	Selenomonadales	Veillonellaceae	Selenomonas	D_6__
	Bacteria	Firmicutes	Negativicutes	Selenomonadales	Veillonellaceae	Veillonella	D_6__
	Bacteria	Firmicutes	Negativicutes	Selenomonadales	Veillonellaceae	Veillonella	D_6__uncultured bacterium
	Bacteria	Fusobacteria	Fusobacteriia	Fusobacteriales	Fusobacteriaceae	Fusobacterium	D_6__
	Bacteria	Fusobacteria	Fusobacteriia	Fusobacteriales	Leptotrichiaceae	Leptotrichia
	Bacteria	Fusobacteria	Fusobacteriia	Fusobacteriales	Leptotrichiaceae	Leptotrichia	D_6__uncultured bacterium
	Bacteria	Gemmatimonadetes	Gemmatimonadetes	Gemmatimonadales	Gemmatimonadaceae	Gemmatimonas
	Bacteria	Gemmatimonadetes	Gemmatimonadetes	Gemmatimonadales	Gemmatimonadaceae	uncultured
	Bacteria	Proteobacteria	Alphaproteobacteria	Caulobacterales	Caulobacteraceae
	Bacteria	Proteobacteria	Alphaproteobacteria	Caulobacterales	Caulobacteraceae
	Bacteria	Proteobacteria	Alphaproteobacteria	Caulobacterales	Caulobacteraceae
	Bacteria	Proteobacteria	Alphaproteobacteria	Caulobacterales	Caulobacteraceae	Brevundimonas
	Bacteria	Proteobacteria	Alphaproteobacteria	Caulobacterales	Caulobacteraceae	Brevundimonas	D_6__
	Bacteria	Proteobacteria	Alphaproteobacteria	Caulobacterales	Caulobacteraceae	Caulobacter
	Bacteria	Proteobacteria	Alphaproteobacteria	Caulobacterales	Caulobacteraceae	Caulobacter	D_6__uncultured bacterium
	Bacteria	Proteobacteria	Alphaproteobacteria	Caulobacterales	Caulobacteraceae	Phenylobacterium	D_6__uncultured alpha proteobacterium
	Bacteria	Proteobacteria	Alphaproteobacteria	Caulobacterales	Caulobacteraceae	Phenylobacterium	D_6__uncultured bacterium
	Bacteria	Proteobacteria	Alphaproteobacteria	Caulobacterales	Caulobacteraceae	Phenylobacterium	D_6__uncultured bacterium
	Bacteria	Proteobacteria	Alphaproteobacteria	Rhizobiales
	Bacteria	Proteobacteria	Alphaproteobacteria	Rhizobiales	Bradyrhizobiaceae		D_6__
	Bacteria	Proteobacteria	Alphaproteobacteria	Rhizobiales	F0723	uncultured bacterium	D_6__uncultured bacterium
	Bacteria	Proteobacteria	Alphaproteobacteria	Rhizobiales	F0723	uncultured bacterium	D_6__uncultured bacterium
	Bacteria	Proteobacteria	Alphaproteobacteria	Rhizobiales	Hyphomicrobiaceae	Hyphomicrobium	D_6__uncultured bacterium
	Bacteria	Proteobacteria	Alphaproteobacteria	Rhizobiales	Hyphomicrobiaceae	Hyphomicrobium	D_6__uncultured bacterium
	Bacteria	Proteobacteria	Alphaproteobacteria	Rhizobiales	Hyphomicrobiaceae	Pedomicrobium
	Bacteria	Proteobacteria	Alphaproteobacteria	Rhizobiales	Methylobacteriaceae	Methylobacterium	D_6__Methylobacterium sp. PC30.44
	Bacteria	Proteobacteria	Alphaproteobacteria	Rhizobiales	Xanthobacteraceae	uncultured	D_6__uncultured Hyphomicrobiaceae bacterium
	Bacteria	Proteobacteria	Alphaproteobacteria	Rhodospirillales	Rhodospirillales Incertae Sedis	Reyranella
	Bacteria	Proteobacteria	Alphaproteobacteria	Rickettsiales	mitochondria	Vermamoeba vermiformis	D_6__Vermamoeba vermiformis
	Bacteria	Proteobacteria	Alphaproteobacteria	Sphingomonadales
	Bacteria	Proteobacteria	Alphaproteobacteria	Sphingomonadales
	Bacteria	Proteobacteria	Alphaproteobacteria	Sphingomonadales
	Bacteria	Proteobacteria	Alphaproteobacteria	Sphingomonadales
	Bacteria	Proteobacteria	Alphaproteobacteria	Sphingomonadales
	Bacteria	Proteobacteria	Alphaproteobacteria	Sphingomonadales
	Bacteria	Proteobacteria	Alphaproteobacteria	Sphingomonadales	Sphingomonadaceae
	Bacteria	Proteobacteria	Alphaproteobacteria	Sphingomonadales	Sphingomonadaceae
	Bacteria	Proteobacteria	Alphaproteobacteria	Sphingomonadales	Sphingomonadaceae		D_6__
	Bacteria	Proteobacteria	Alphaproteobacteria	Sphingomonadales	Sphingomonadaceae	Sphingobium
	Bacteria	Proteobacteria	Alphaproteobacteria	Sphingomonadales	Sphingomonadaceae	Sphingobium
	Bacteria	Proteobacteria	Alphaproteobacteria	Sphingomonadales	Sphingomonadaceae	Sphingobium
	Bacteria	Proteobacteria	Alphaproteobacteria	Sphingomonadales	Sphingomonadaceae	Sphingobium
	Bacteria	Proteobacteria	Alphaproteobacteria	Sphingomonadales	Sphingomonadaceae	Sphingomonas
	Bacteria	Proteobacteria	Alphaproteobacteria	Sphingomonadales	Sphingomonadaceae	Sphingomonas
	Bacteria	Proteobacteria	Alphaproteobacteria	Sphingomonadales	Sphingomonadaceae	Sphingomonas	D_6__
	Bacteria	Proteobacteria	Alphaproteobacteria	Sphingomonadales	Sphingomonadaceae	Sphingomonas	D_6__
	Bacteria	Proteobacteria	Alphaproteobacteria	Sphingomonadales	Sphingomonadaceae	Sphingopyxis
	Bacteria	Proteobacteria	Alphaproteobacteria	Sphingomonadales	Sphingomonadaceae	Sphingopyxis
	Bacteria	Proteobacteria	Alphaproteobacteria	Sphingomonadales	Sphingomonadaceae	Sphingopyxis
	Bacteria	Proteobacteria	Betaproteobacteria	Burkholderiales
	Bacteria	Proteobacteria	Betaproteobacteria	Burkholderiales	Burkholderiaceae	Cupriavidus
	Bacteria	Proteobacteria	Betaproteobacteria	Burkholderiales	Burkholderiaceae	Cupriavidus	D_6__
	Bacteria	Proteobacteria	Betaproteobacteria	Burkholderiales	Burkholderiaceae	Ralstonia
	Bacteria	Proteobacteria	Betaproteobacteria	Burkholderiales	Comamonadaceae
	Bacteria	Proteobacteria	Betaproteobacteria	Burkholderiales	Comamonadaceae
	Bacteria	Proteobacteria	Betaproteobacteria	Burkholderiales	Comamonadaceae
	Bacteria	Proteobacteria	Betaproteobacteria	Burkholderiales	Comamonadaceae
	Bacteria	Proteobacteria	Betaproteobacteria	Burkholderiales	Comamonadaceae
	Bacteria	Proteobacteria	Betaproteobacteria	Burkholderiales	Comamonadaceae
	Bacteria	Proteobacteria	Betaproteobacteria	Burkholderiales	Comamonadaceae	Aquabacterium	D_6__uncultured bacterium
	Bacteria	Proteobacteria	Betaproteobacteria	Methylophilales	Methylophilaceae	Methylophilus	D_6__uncultured bacterium
	Bacteria	Proteobacteria	Betaproteobacteria	Neisseriales	Neisseriaceae	Neisseria	D_6__uncultured bacterium
	Bacteria	Proteobacteria	Betaproteobacteria	Nitrosomonadales	Nitrosomonadaceae	uncultured	D_6__uncultured organism
	Bacteria	Proteobacteria	Betaproteobacteria	Rhodocyclales	Rhodocyclaceae	Methyloversatilis	D_6__uncultured bacterium
	Bacteria	Proteobacteria	Epsilonproteobacteria	Campylobacterales	Campylobacteraceae	Campylobacter
	Bacteria	Proteobacteria	Gammaproteobacteria	Alteromonadales	Shewanellaceae	Shewanella
	Bacteria	Proteobacteria	Gammaproteobacteria	Cardiobacteriales	Cardiobacteriaceae	Cardiobacterium
	Bacteria	Proteobacteria	Gammaproteobacteria	Chromatiales	Chromatiaceae	Rheinheimera	D_6__uncultured Rheinheimera sp.
	Bacteria	Proteobacteria	Gammaproteobacteria	Legionellales	Coxiellaceae	uncultured	D_6__uncultured gamma proteobacterium
	Bacteria	Proteobacteria	Gammaproteobacteria	Oceanospirillales	Halomonadaceae	Halomonas	D_6__
	Bacteria	Proteobacteria	Gammaproteobacteria	Pasteurellales	Pasteurellaceae
	Bacteria	Proteobacteria	Gammaproteobacteria	Pasteurellales	Pasteurellaceae	Haemophilus	D_6__uncultured bacterium
	Bacteria	Proteobacteria	Gammaproteobacteria	Pseudomonadales	Moraxellaceae	Acinetobacter
	Bacteria	Proteobacteria	Gammaproteobacteria	Pseudomonadales	Moraxellaceae	Acinetobacter	D_6__
	Bacteria	Proteobacteria	Gammaproteobacteria	Pseudomonadales	Moraxellaceae	Perlucidibaca	D_6__uncultured bacterium
	Bacteria	Proteobacteria	Gammaproteobacteria	Pseudomonadales	Pseudomonadaceae	Pseudomonas
	Bacteria	Proteobacteria	Gammaproteobacteria	Pseudomonadales	Pseudomonadaceae	Pseudomonas	D_6__Pseudomonas fluorescens
	Bacteria	Proteobacteria	Gammaproteobacteria	Xanthomonadales	Nevskiaceae	Nevskia	D_6__uncultured bacterium
	Bacteria	Proteobacteria	Gammaproteobacteria	Xanthomonadales	Xanthomonadaceae
	Bacteria	Proteobacteria	Gammaproteobacteria	Xanthomonadales	Xanthomonadaceae	Silanimonas
	Bacteria	Proteobacteria	Gammaproteobacteria	Xanthomonadales	Xanthomonadaceae	Silanimonas	D_6__uncultured bacterium
	Bacteria	Proteobacteria	Gammaproteobacteria	Xanthomonadales	Xanthomonadaceae	Stenotrophomonas
	Bacteria	Proteobacteria	Gammaproteobacteria	Xanthomonadales	Xanthomonadaceae	Tahibacter	D_6__uncultured bacterium
